# Supplementary material
Source: Springer Nature journal article supplement (https://www.springermedizin.de/resource/supplementary/12885_2012_4027_MOESM13_ESM.pdf/9465002)

# Unstained Whole Mount

GFP-mouse

Ex 860 nm

## A

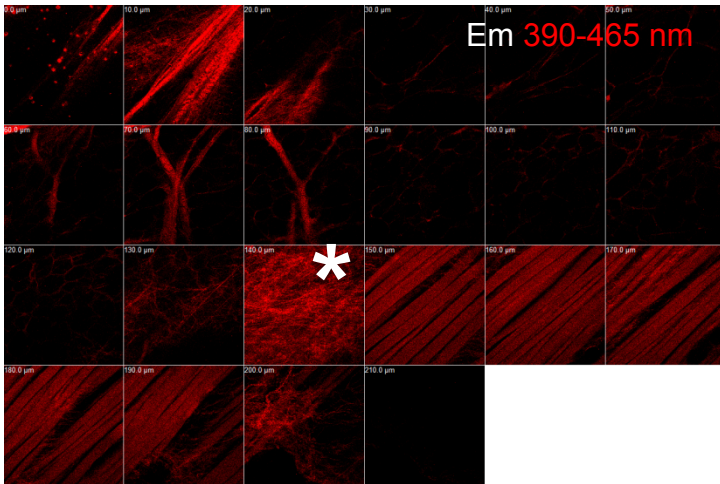

## B

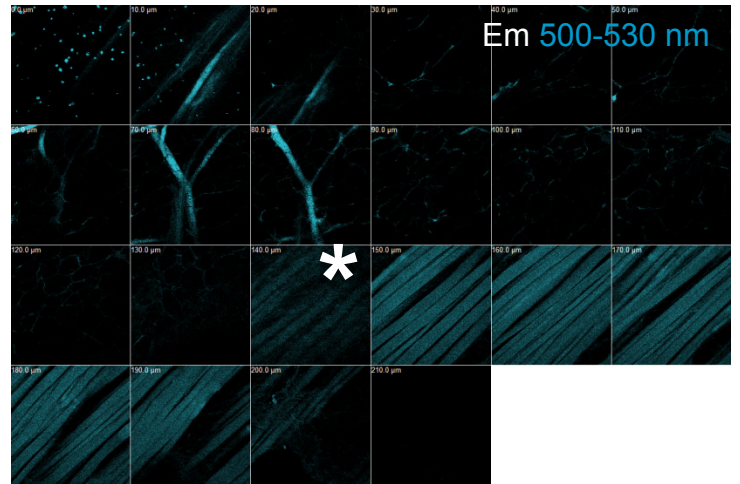

## C

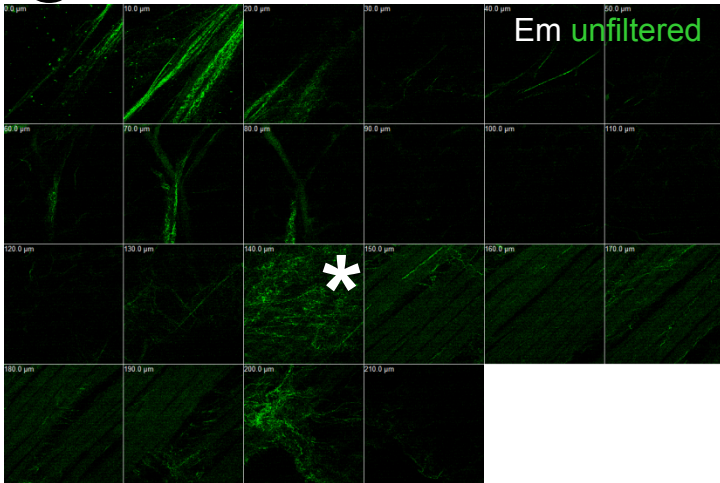

## D

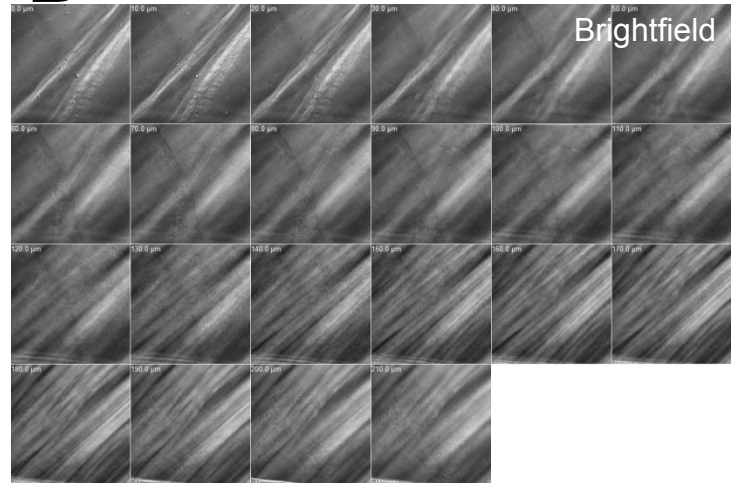

## E

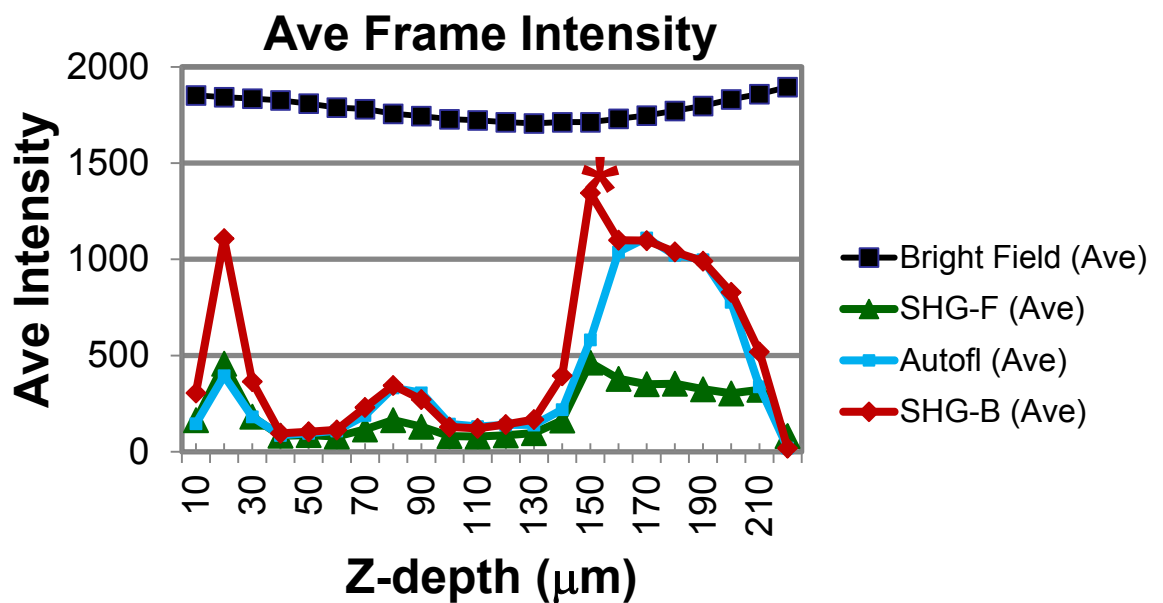

Supplement: MOESM13 [file 9465002]
